# Supplementary material for: Fumarate induces vesicular release of mtDNA to drive innate immunity
Source: Springer Nature journal article supplement (doi:10.1038/s41586-023-05770-w), 2023-03-08
Supplement: MOESM1 [file 41586_2023_5770_MOESM1_ESM.pdf]

---

**Supplementary information**

---

**Fumarate induces vesicular release of  
mtDNA to drive innate immunity**

---

In the format provided by the  
authors and unedited

## **Fumarate induces vesicular release of mtDNA to drive innate immunity**

Vincent Zecchini<sup>1,16</sup>, Vincent Paupe<sup>2,16</sup>, Irene Herranz-Montoya<sup>1,8</sup>, Joelle Janssen<sup>1,9</sup>, Inge M.N. Wortel<sup>1,10</sup>, Jordan L. Morris<sup>2</sup>, Ashley Ferguson<sup>1</sup>, Suvagata Roy Chowdury<sup>2</sup>, Marc Segarra-Mondejar<sup>1,11</sup>, Ana S. H. Costa<sup>1,12</sup>, Goncalo C. Pereira<sup>2</sup>, Laura Tronci<sup>1,13</sup>, Tim Young<sup>1</sup>, Efterpi Nikitopoulou<sup>1</sup>, Ming Yang<sup>1,11</sup>, Dóra Bihary<sup>1,14</sup>, Federico Caicci<sup>3</sup>, Shun Nagashima<sup>2,15</sup>, Alyson Speed<sup>1</sup>, Kalliopi Bokea<sup>4</sup>, Zara Baig<sup>5</sup>, Shamith Samarajiwa<sup>1</sup>, Maxine Tran<sup>4</sup>, Thomas Mitchell<sup>6,7</sup>, Mark Johnson<sup>2</sup>, Julien Prudent<sup>2,17,\*</sup> & Christian Frezza<sup>1,11,17,\*</sup>

<sup>1</sup>Medical Research Council Cancer Unit, University of Cambridge, Cambridge, UK.

<sup>2</sup>Medical Research Council Mitochondrial Biology Unit, University of Cambridge, Cambridge, UK.

<sup>3</sup>Department of Biology, University of Padova, Padova Italy.

<sup>4</sup>Department of Surgical Biotechnology, Division of Surgery and Interventional Science, UCL, London, UK.

<sup>5</sup>Division of Infection and Immunity, Institute of Immunity and Transplantation, UCL, London, UK.

<sup>6</sup>Wellcome Sanger Institute, Wellcome Genome Campus, Hinxton, Cambridge, UK.

<sup>7</sup>Department of Surgery, University of Cambridge, Cambridge, UK.

<sup>8</sup>Present address: Molecular Oncology Programme, Growth Factors, Nutrients and Cancer Group, Centro Nacional de Investigaciones Oncológicas (CNIO), Madrid, Spain.

<sup>9</sup>Present address: Human and Animal Physiology, Wageningen University and Research, Wageningen, the Netherlands.

<sup>10</sup>Present address: Department of Data Science, institute for Computing and information Sciences, Radboud University, Nijmegen, the Netherlands.

<sup>11</sup>Present address: CECAD Research Centre, University of Cologne, Cologne, Germany.

<sup>12</sup>Present address: Matterworks, Somerville, MA, USA.

<sup>13</sup>Present address: Cogentech SRL Benefit Corporation, Milan, Italy.

<sup>14</sup>Present address: VIB KU Leuven Center for Cancer Biology, Leuven, Belgium.

<sup>15</sup>Present address: Laboratory of Regenerative Medicine, School of Life Sciences, Tokyo University of Pharmacy and Life Sciences, Tokyo, Japan.

<sup>16</sup>These authors contributed equally: Vincent Zecchini, Vincent Paupe.

<sup>17</sup>These authors jointly supervised this work: Julien Prudent, Christian Frezza.

\*e-mail: [julien.prudent@mrc-mbu.cam.ac.uk](mailto:julien.prudent@mrc-mbu.cam.ac.uk); [christian.frezza@uni-koeln.de](mailto:christian.frezza@uni-koeln.de)

This Supplementary information file contains:

- Supplementary Figures S1- S10
- Supplementary Tables 1-3 legends, and Supplementary Tables 4-5



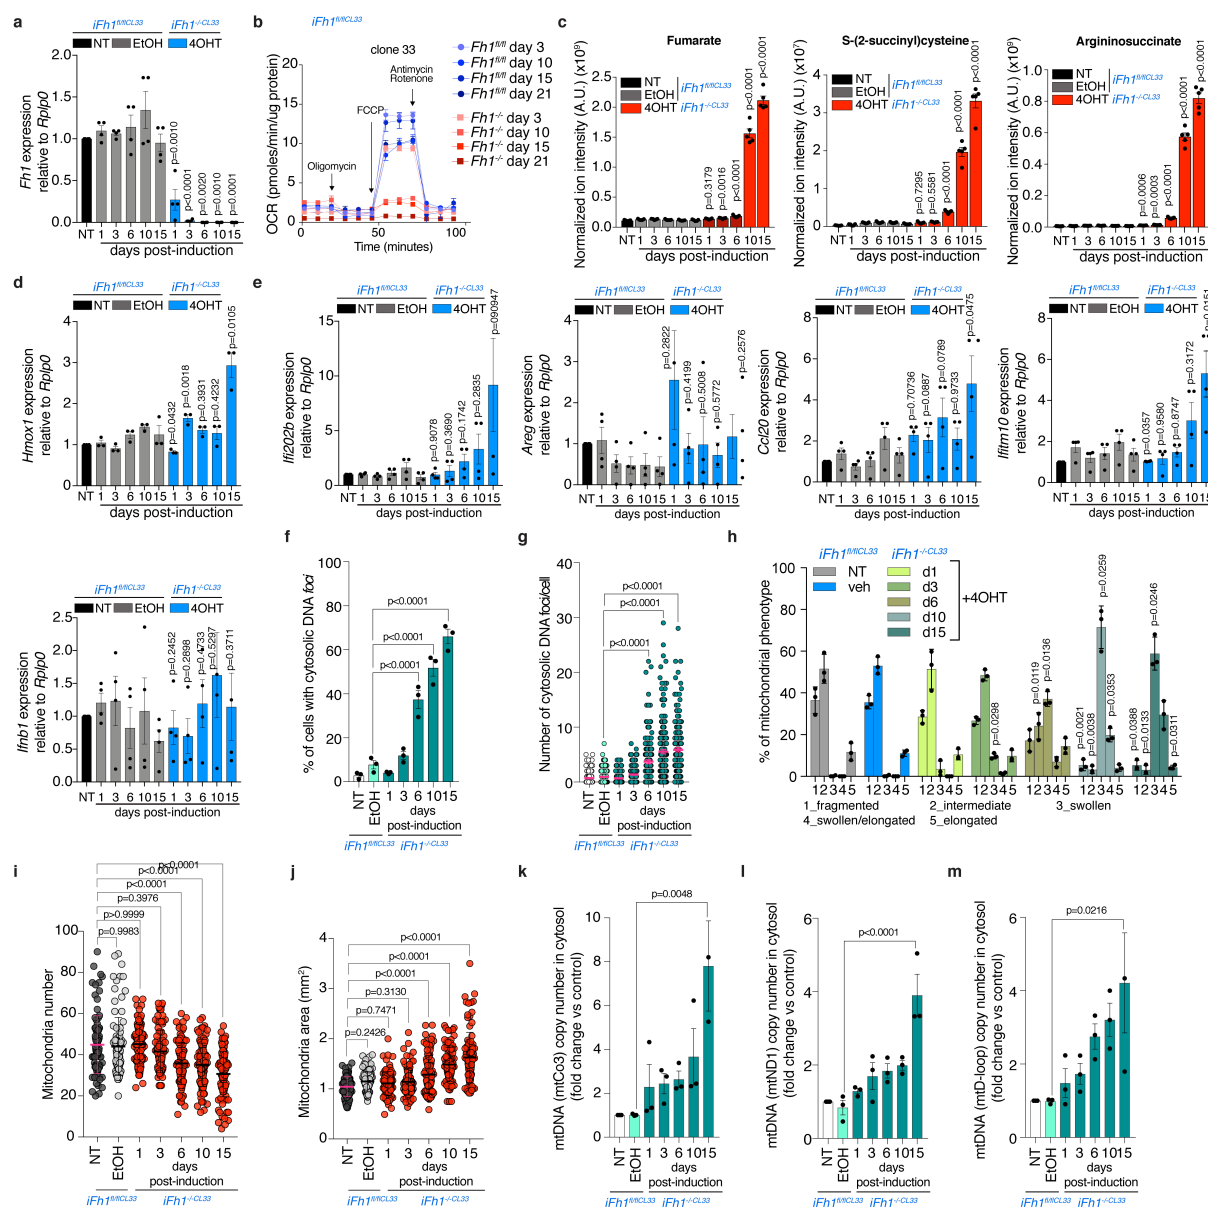

## Supplementary Figure 1

**a**, qRT-PCR showing expression levels of *Fhl* in inducible *iFhl* epithelial kidney cell lines clones 33 (*iFhl*<sup>fl/CL33</sup>) untreated (NT) or treated with either vehicle (ethanol; EtOH) or 4-hydroxytamoxifen (4-OHT) (*iFhl*<sup>-CL33</sup>) for the indicated period of time. *n* = 5 independent experiments. **b**, Mitochondrial respiration measured using Seahorse in *iFhl*<sup>CL33</sup> cells. *n* = 3 independent experiments. **c**, Relative abundance of fumarate (left), S-(2-succinyl)cysteine (middle) and argininosuccinate (right) in *iFhl*<sup>CL33</sup> cells measured by liquid-chromatography mass-spectrometry (LC-MS). Peak intensity is shown with A.U.= arbitrary units. *n* = 5 independent experiments. **d**, qRT-PCR showing expression levels of the transcriptional marker of *Fhl* loss, *Hmx1*, in *iFhl*<sup>CL33</sup> cells. *n* = 5 independent experiments. Bar graphs show the fold change expression, for which the expression in control samples was set to 1. Indicated *p*-

values are relative to the corresponding vehicle (EtOH)-treated time point. **e**, qRT-PCR showing expression levels of *Ifnb1* and Interferon-stimulated genes (ISGs) (*Ifi202b*, *Ifitm10*, *Areg* and *Ccl20*) in *iFhl<sup>CL33</sup>* cells. *n* = 5 independent experiments. Bar graphs show the fold change expression, for which the expression in control samples was set to 1. Indicated p-values are relative to the corresponding EtOH-treated time point. **f,g**, Percentage of *iFhl<sup>CL33</sup>* cells showing cytosolic DNA *foci* (**f**), and number of cytosolic DNA *foci* per cell (**g**). *n* = 3 independent experiments. **h-j**, Classification of mitochondrial morphology (**h**), quantification of mitochondria number (**i**), and area (**j**), in *iFhl<sup>CL33</sup>* cells. *n* = 3 independent experiments. Indicated p-values are relative to the corresponding vehicle (EtOH)-treated morphology category. **k-m**, Quantification of mtDNA copy number by digital droplet PCR (ddPCR) using either a mtCo3 (**k**), ND1 (**l**) or D-loop (**m**) probe, from isolated cytosolic fractions of *iFhl<sup>CL33</sup>* cells. *n* = 3 independent experiments. Data are mean  $\pm$  s.e.m. **a,c-e**, Students t-test corrected for multiple comparison with the Holm-Sidak method, **f,g,i-m**, one-way ANOVA with Tukey's multiple comparison test, **h**, two-way ANOVA with Tukey's multiple comparison test.

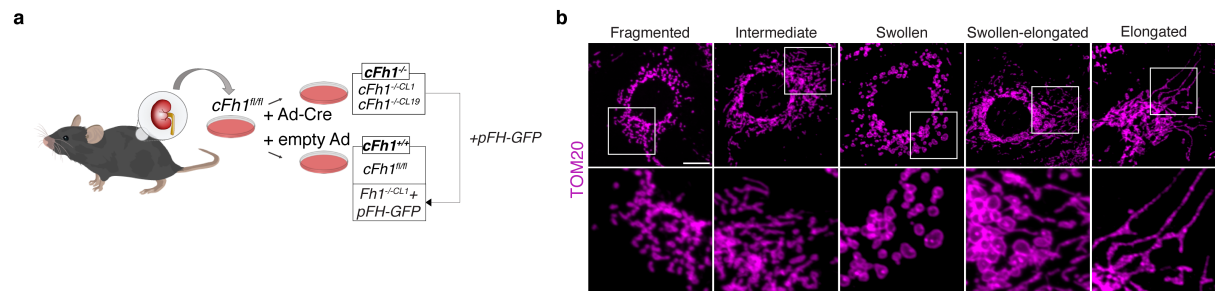

## Supplementary Figure 2

**a**, Schematic diagram for the generation of two epithelial kidney cell lines with chronic *Fhl* deletion (*cFhl*<sup>-/-CL1</sup> and *cFhl*<sup>-/-CL19</sup>) from *cFhl*<sup>fl/fl</sup>. Ad-Cre = adenovirus-Cre. pFH = human FH-expressing exogenous plasmid. **b**, Representative confocal images of mitochondrial morphology (TOM20) in *cFhl*<sup>-/-CL19</sup> cells with indicated mitochondrial morphology phenotypes. Scale bar: 10  $\mu$ m.



lines. **c**, Volcano plot for the Gene Set Enrichment Analysis highlighting the differentially regulated pathways in *cSdhb*<sup>-/-CL5</sup> (orange) and *cSdhb*<sup>-/-CL7</sup> (red) vs *Sdhb*<sup>fl/fl</sup> kidney cell lines. NES=Normalised Enrichment Score. **d**, Representative confocal images of mitochondrial morphology (TOM20) and DNA *foci* (DNA) in *cSdhb* cells. Scale bar: 10  $\mu$ m. **e**, Quantification of mitochondrial morphology in *cSdhb* cell lines. *n* = 3 independent experiments. **f,g**, Number of cytosolic DNA *foci* per cell (**f**), and percentage of cells with cytosolic DNA (**g**), in *cSdhb* cells from **d**. *n* = 3 independent experiments. **h-j**, Quantification of mtDNA copy number by ddPCR using either a mtCo3 (**h**), mtND1 (**i**), or D-loop (**j**) probe, from isolated cytosolic fractions of *cSdhb* cell lines. *n* = 3 independent experiments. **k**, Expression of a panel of ISGs (left) and negative controls *Hmox1* and *Tfam* (right), in *cSdhb* cells measured by qRT-PCR. *n* = 3 independent experiments. Bar graphs show the fold change expression, for which the expression in control samples was set to 1. Data are mean  $\pm$  s.e.m. **a,f-k**, one-way ANOVA with Tukey's multiple comparison test, **e**, two-way ANOVA with Tukey's multiple comparison test.

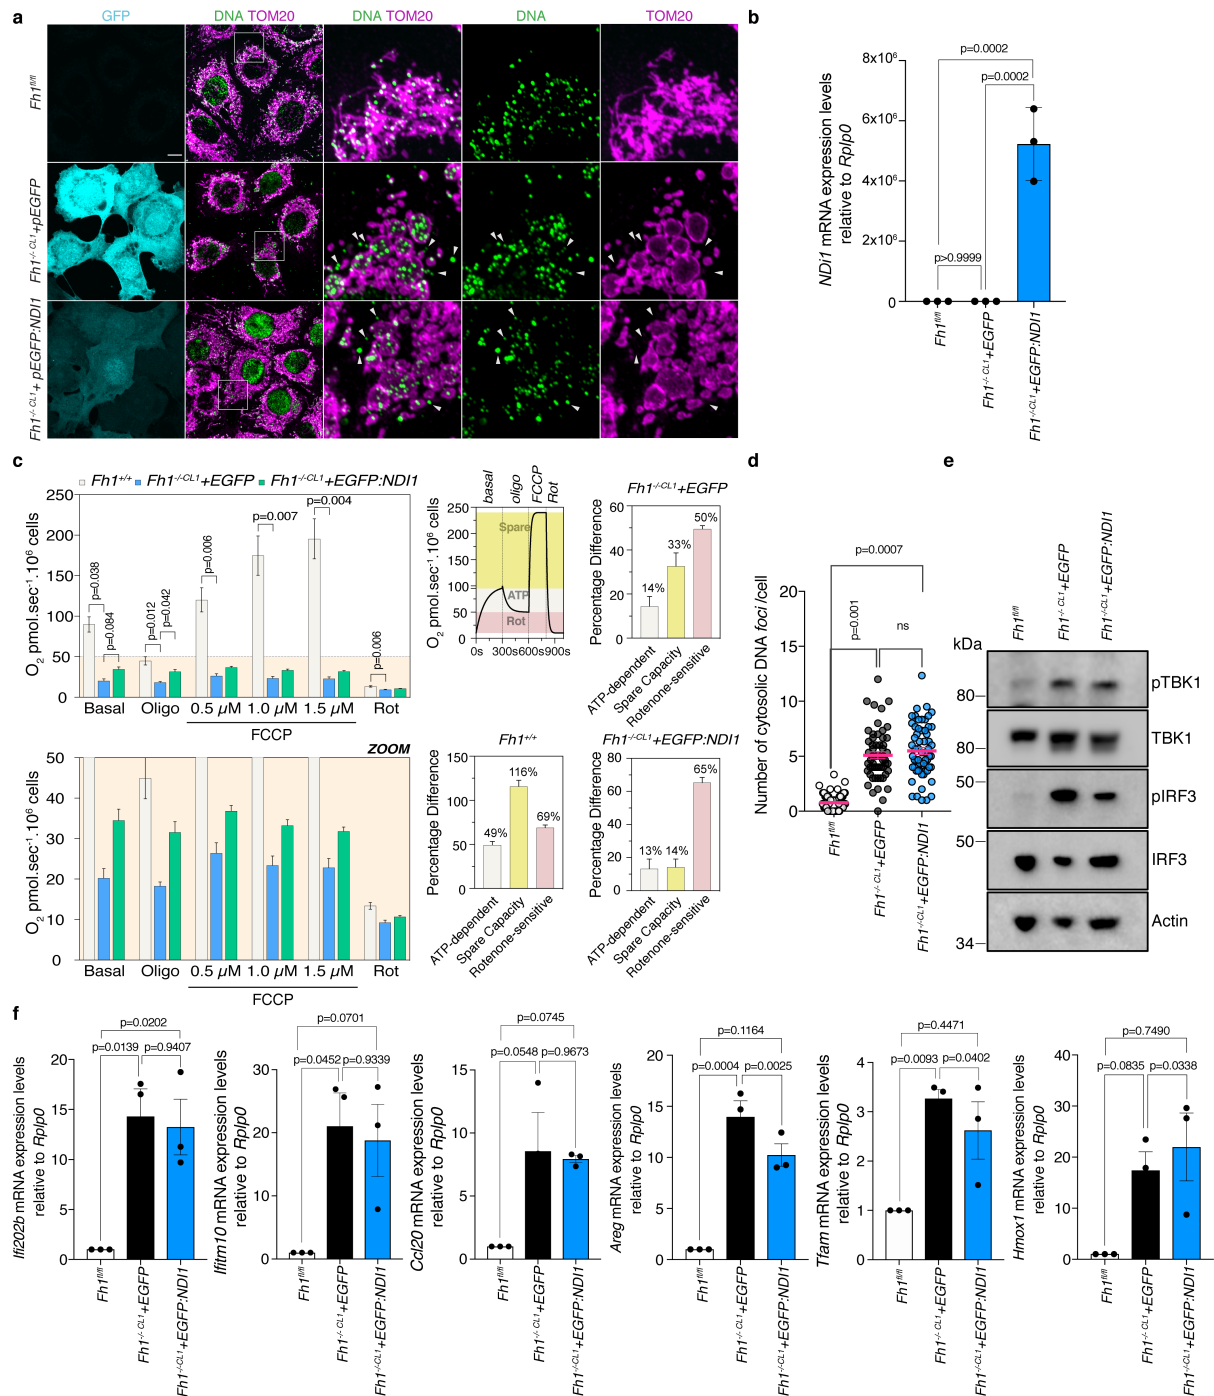

## Supplementary Figure 4

**a**, Representative confocal images of *cFhl*<sup>fl/fl</sup> and *cFhl*<sup>-/-CL1</sup> cells stably expressing pEGFP (*cFhl*<sup>-/-CL1</sup>+EGFP) or pEGFP:ND1 (*cFhl*<sup>-/-CL1</sup>+EGFP:ND1). Mitochondria and DNA were labelled using anti-TOM20 and anti-DNA antibodies, respectively. White arrows indicate cytosolic DNA foci. Scale bar: 10  $\mu$ m. **b**, mRNA expression of *ND1* in *cFhl* cells measured by qRT-PCR. *n* = 3 independent experiments. Bar graphs show the fold change expression, for which the expression in control samples was set to 1. **c**, Quantification of oxygen consumption in *cFhl* cells with Oroboros (left panels); panels on the right represent the percentage of ATP

dependent, spare capacity and rotenone sensitive oxygen consumption. *n* = 4 independent experiments. **d**, Number of cytosolic DNA *foci* in *cFhl* cells from **a**. *n* = 3 independent experiments. **e**, Immunoblots of specified proteins in *cFhl* cells. **f**, Expression of the ISGs *Ifi202b*, *Ifitm10*, *Ccl20* and *Areg*; and negative and positive controls *Tfam* and *Hmox1*, respectively, in *cFhl* cells. *n* = 3 independent experiments. Bar graphs show the fold change expression, for which the expression in control samples was set to 1. Data are mean  $\pm$  s.e.m. **b,d,f**, one-way ANOVA with Tukey's multiple comparison test.

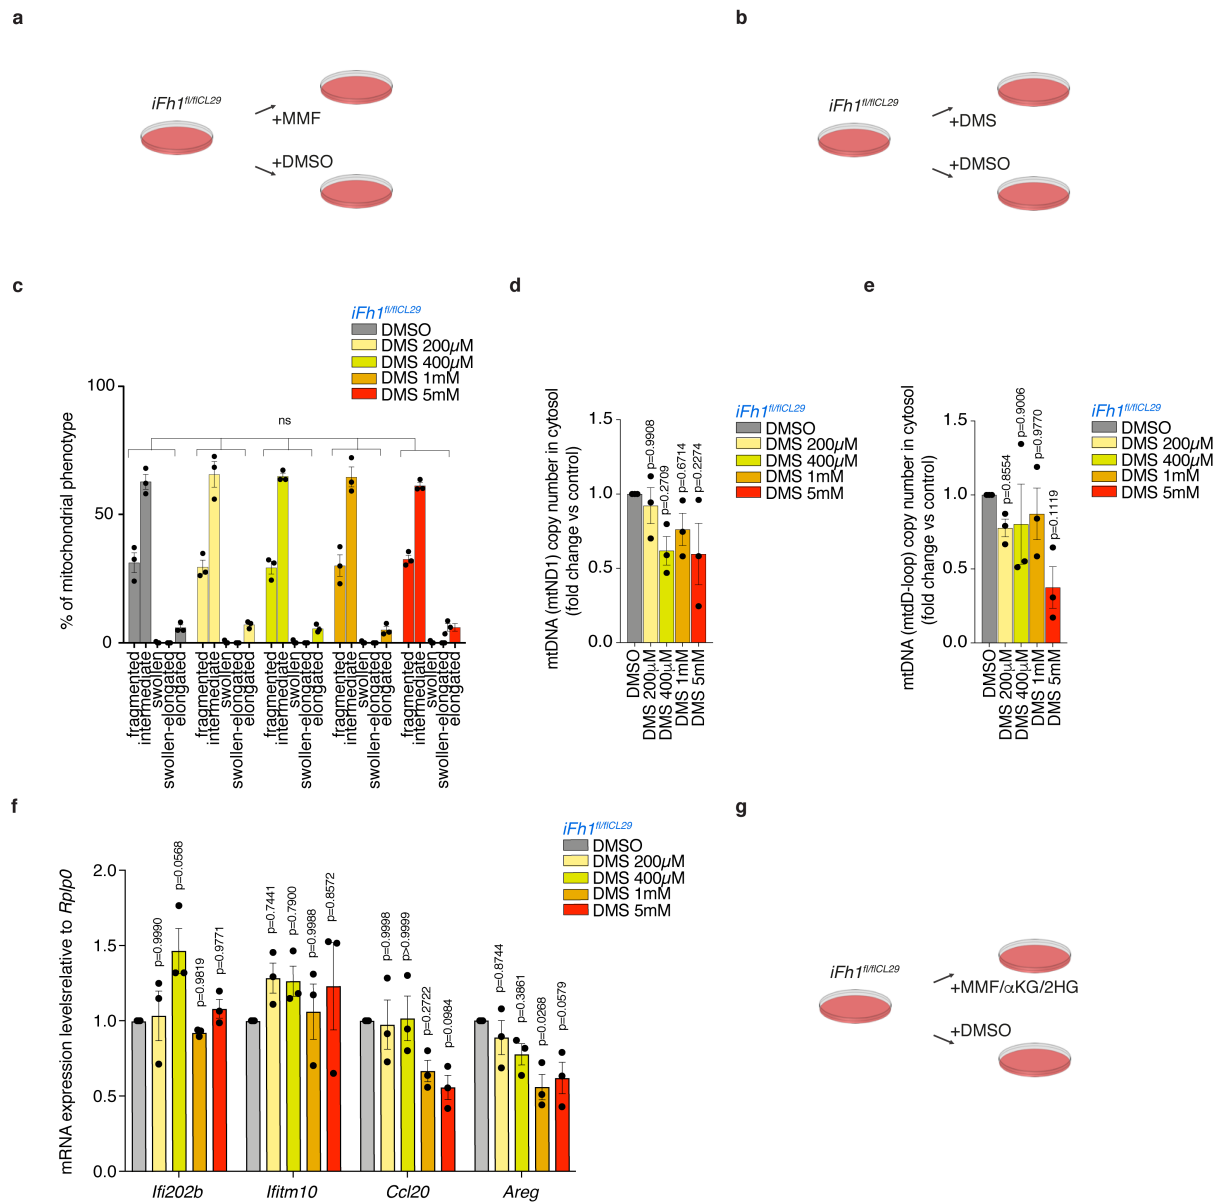

## Supplementary Figure 5

**a**, Schematic diagram showing cell permeable form of fumarate, monomethylfumarate (MMF), treatment of inducible *iFh1* epithelial kidney cell lines clones 29 (*iFh1<sup>Δ/Δ</sup>CL29*). **b**, schematic diagram showing cell permeable form of succinate, dimethylsuccinate (DMS), treatment of *iFh1<sup>Δ/Δ</sup>CL29*. **c**, Classification of mitochondrial morphology in *iFh1<sup>Δ/Δ</sup>CL29* cells treated with vehicle (DMSO) or DMS at the indicated concentration for 8 days.  $n = 3$  independent experiments. **d,e**, Quantification of mtDNA copy number by ddPCR using either a ND1 (**d**) or D-loop (**e**) probe, from isolated cytosolic fractions of *iFh1<sup>Δ/Δ</sup>CL29* cells treated with DMSO or DMS.  $n = 3$  independent experiments. **f**, Expression of the ISGs *Ifi202b*, *Ifitm10*, *Ccl20* and *Areg* in *iFh1<sup>Δ/Δ</sup>CL29* cells treated with DMSO or DMS.  $n = 3$  independent experiments. **g**, Schematic diagram showing MMF, αKG or 2-HG treatment of *iFh1<sup>Δ/Δ</sup>CL29* cells. Data are mean



$\pm$  s.e.m. **c**, two-way ANOVA with Tukey's multiple comparison test, **d-f**, one way ANOVA with Tukey's multiple comparison test, bar graphs show the fold change expression, for which the expression in control samples was set to 1. p-values indicated above each bar are relative to the DMSO control.

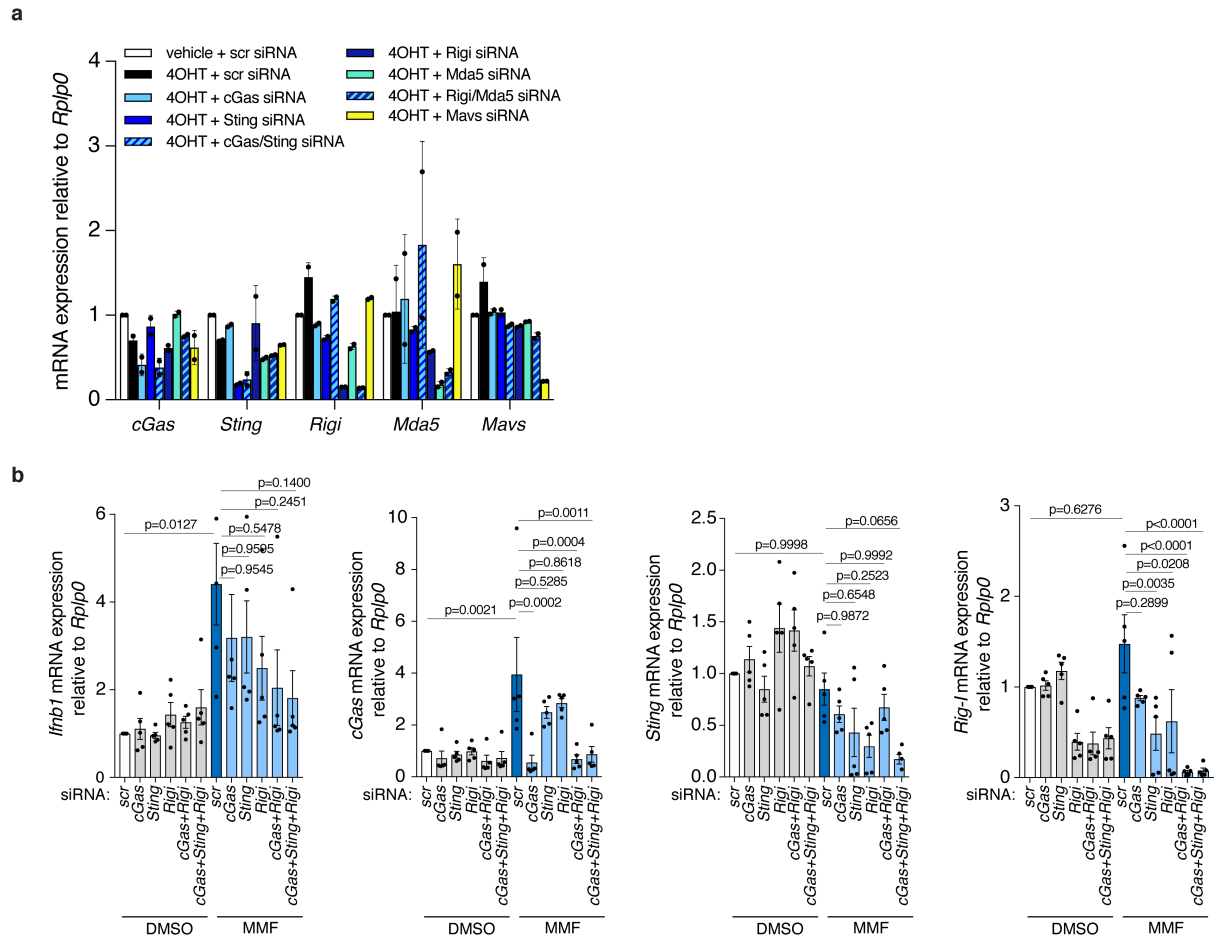

### Supplementary Figure 6

**a**, mRNA expression of siRNA-targeted genes in *iFhl<sup>CL29</sup>* cells at 15 days post induction transfected with indicated siRNA measured by qRT-PCR.  $n = 2$  independent experiments. Bar graphs show the fold change expression, for which the expression in control samples was set to 1. **b**, mRNA expression of *Ifnb1* and siRNA-targeted genes *cGas*, *Sting*, and *Rig-I* in *iFhl<sup>CL29</sup>* cells, treated with either DMSO or MMF for 8 days, and with combinations of siRNAs for *cGas*, *Sting* and *Rig-I*; measured by qRT-PCR.  $n = 4$  independent experiments. Bar graphs show the fold change expression, for which the expression in control samples was set to 1. Data are mean  $\pm$  s.e.m. **b**, one-way ANOVA with Tukey's multiple comparison test.

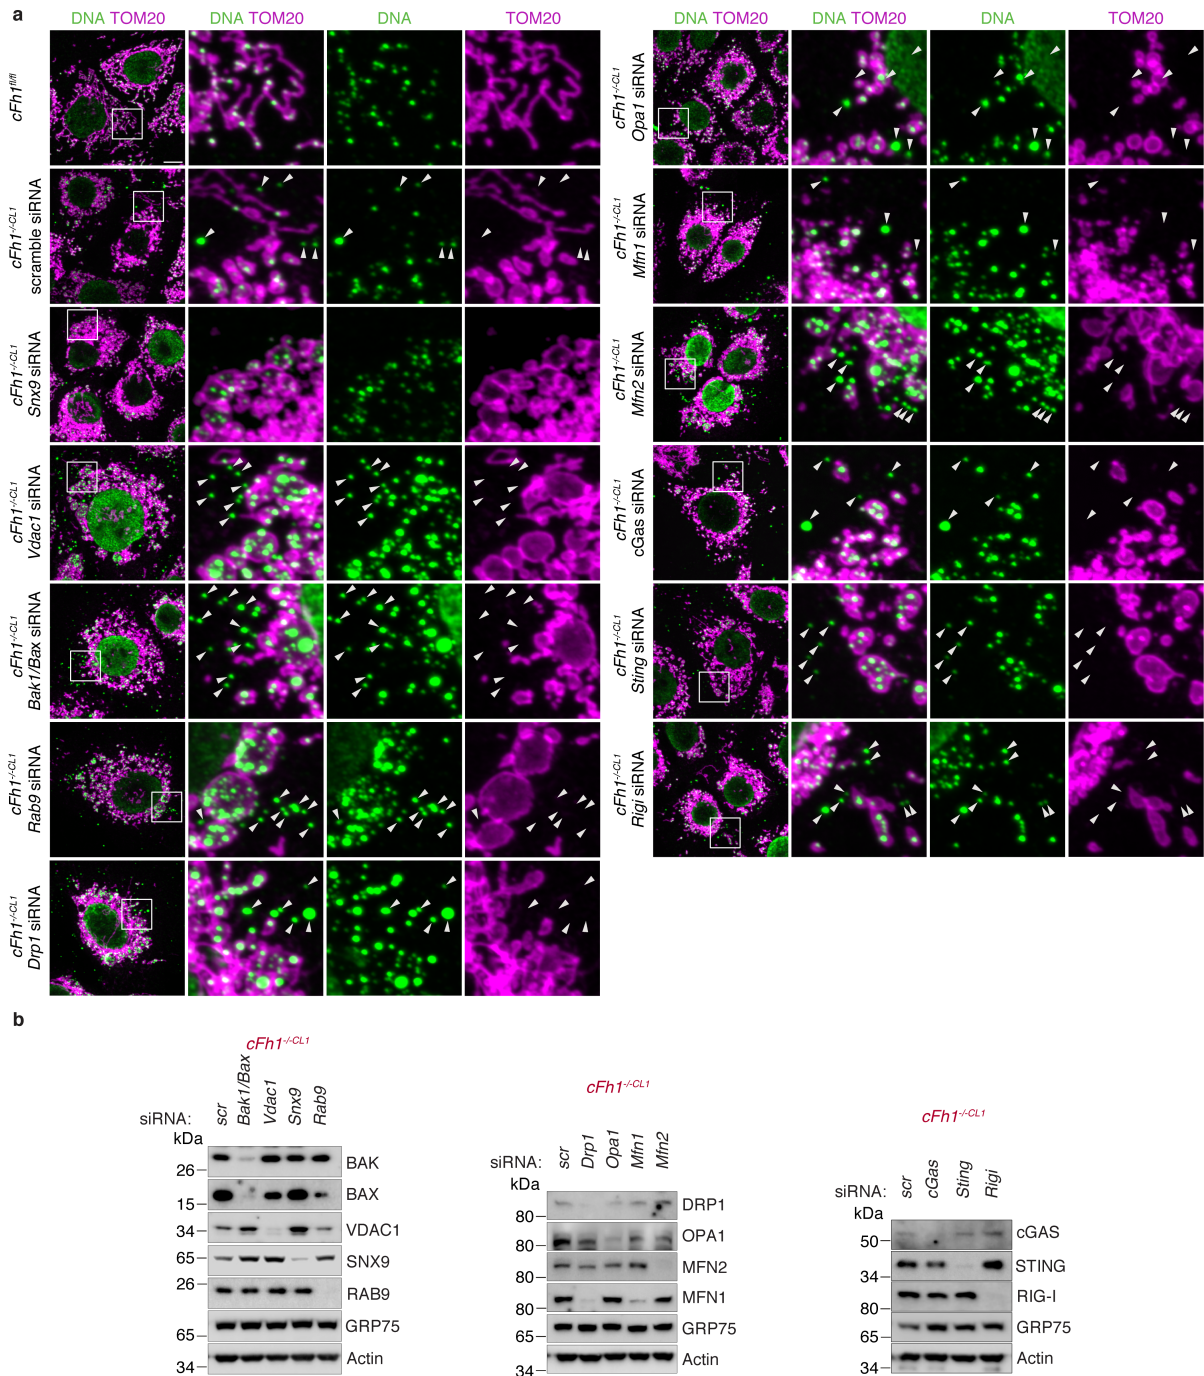

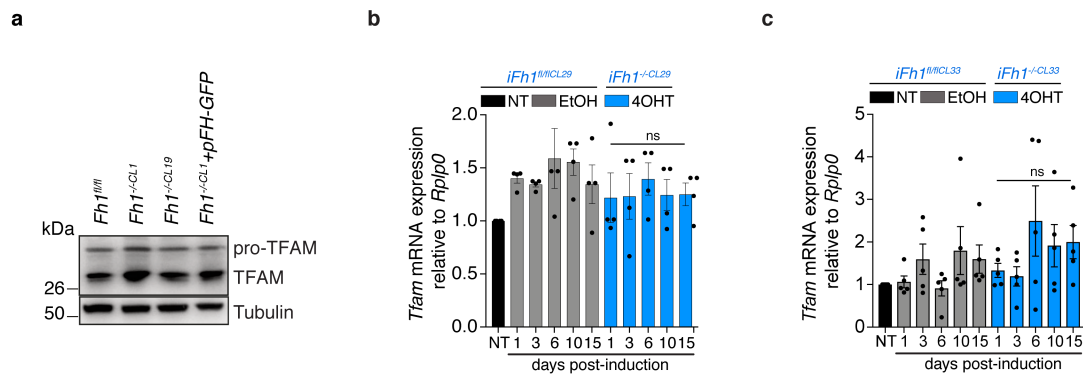

### Supplementary Figure 8

**a**, Immunoblots of pro-TFAM and TFAM in *cFhl* cells. **b,c**, *Tfam* expression in untreated (NT), vehicle (EtOH)- or 4-hydroxytamoxifen (4-OHT)-treated *iFhl*<sup>fl/flCL29</sup> (left) and *iFhl*<sup>fl/flCL33</sup> (right) cells, measured by qRT-PCR.  $n = 5$  independent experiments. Bar graphs show the fold change expression, for which the expression in control samples was set to 1. Data are mean  $\pm$  s.e.m. **b,c**, Students t-test corrected for multiple comparison with the Holm-Sidak method.

**a**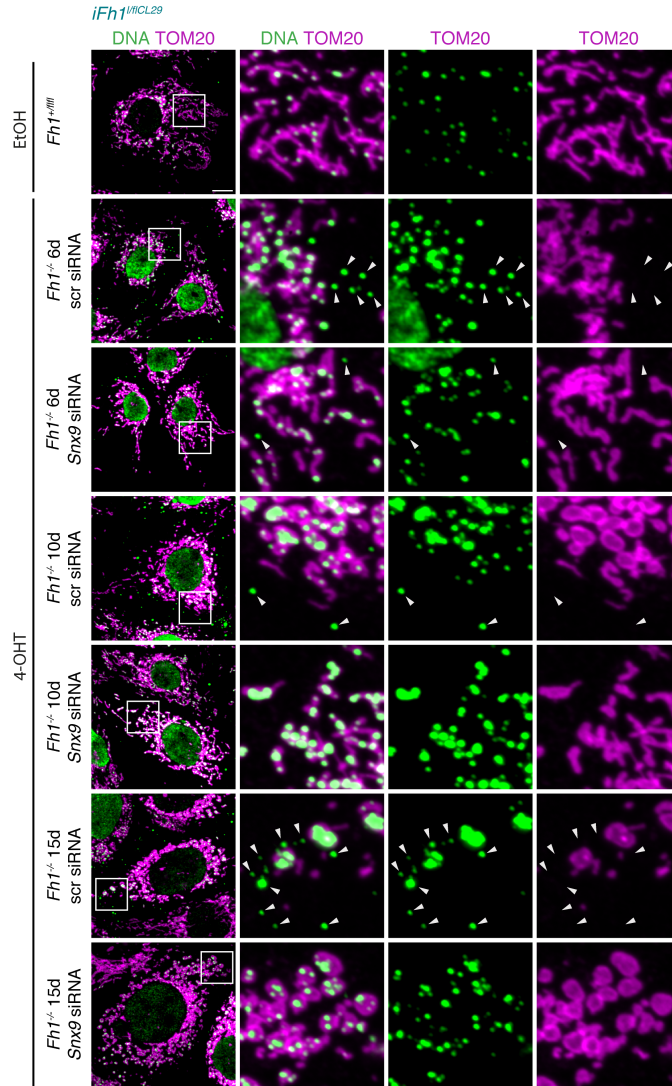**b**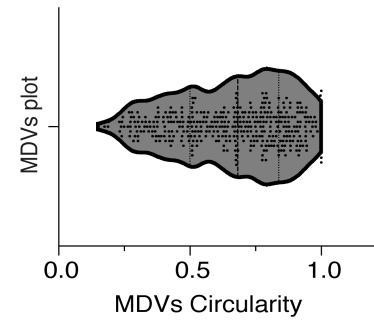**Supplementary Figure 9**

**a**, Representative confocal images of mitochondrial morphology (TOM20) and DNA *foci* (DNA) in vehicle (EtOH)- or 4-hydroxytamoxifen (4-OHT)-treated *iFhl1<sup>fl/CL29</sup>* cells transfected with scramble (scr) or *Snx9* siRNA for the indicated period of time. White arrows indicate cytosolic DNA *foci*. Scale bar: 10  $\mu$ m. **b**, Quantification of the circularity of TOM20-PDH<sup>+</sup>DNA<sup>+</sup> MDVs obtained from lattice super resolution SIM image of MMF-treated *cFhl1<sup>fl/fl</sup>* cells. *n* = 3 independent experiments.

## Uncropped Immunoblots: Main Figures

**Figure 2a**

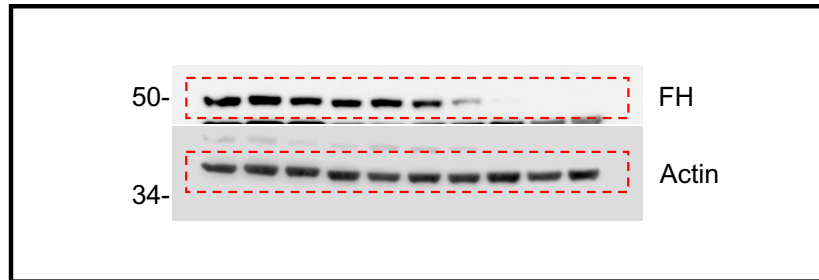

**Figure 2c**

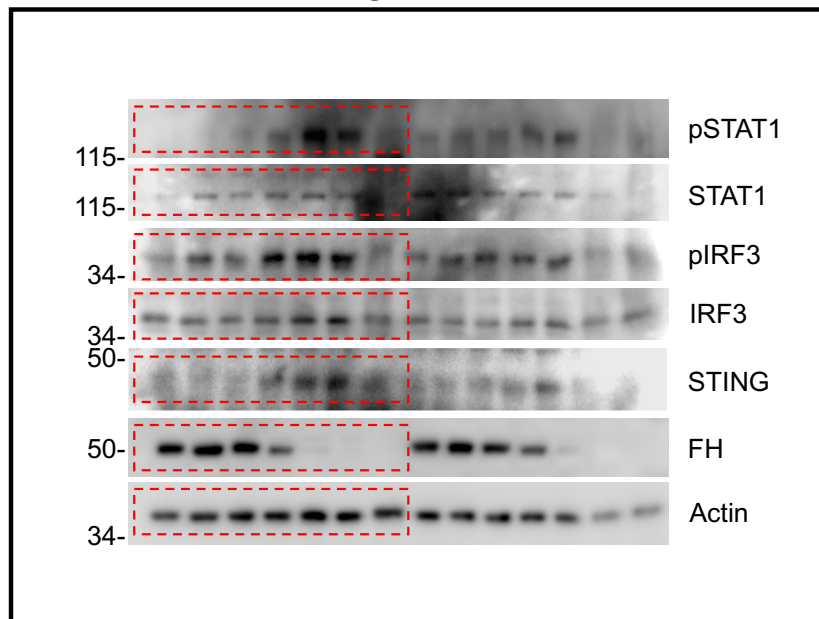

**Figure 3e**

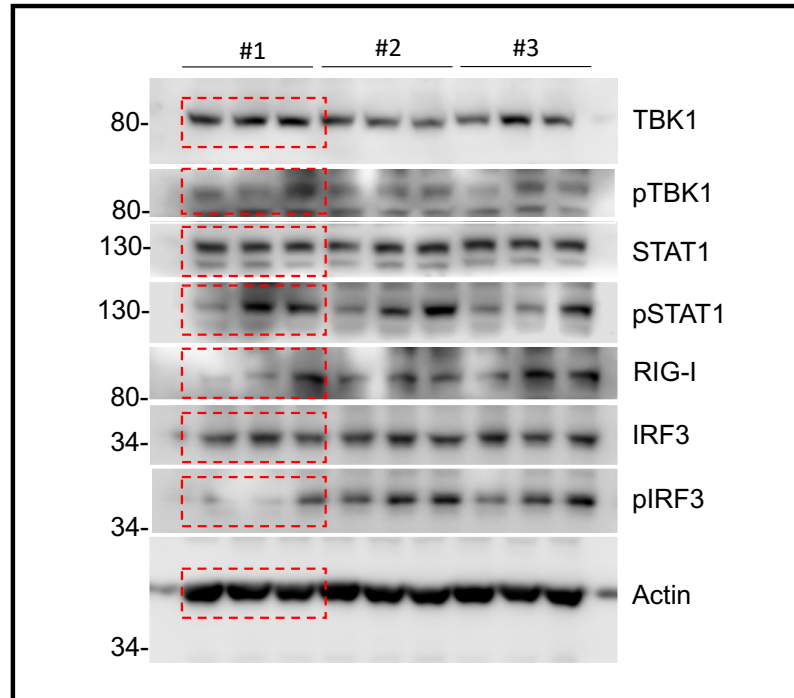

**Figure 3g**

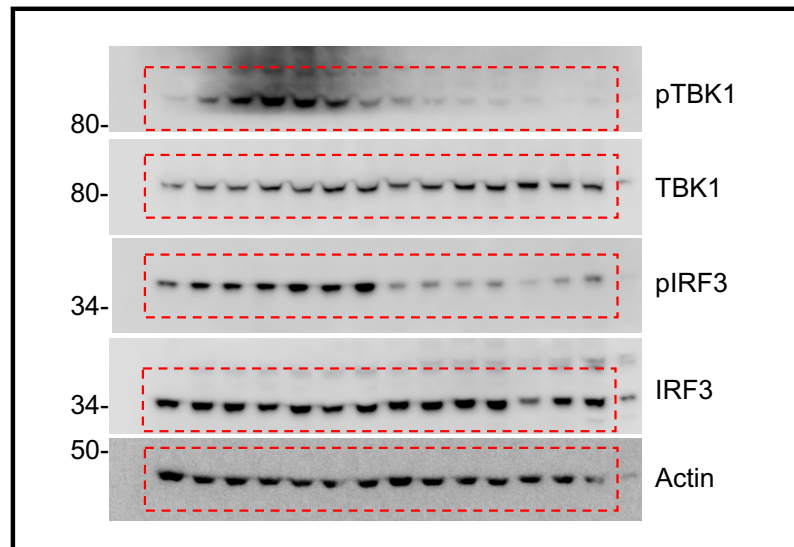

**Figure 3i**

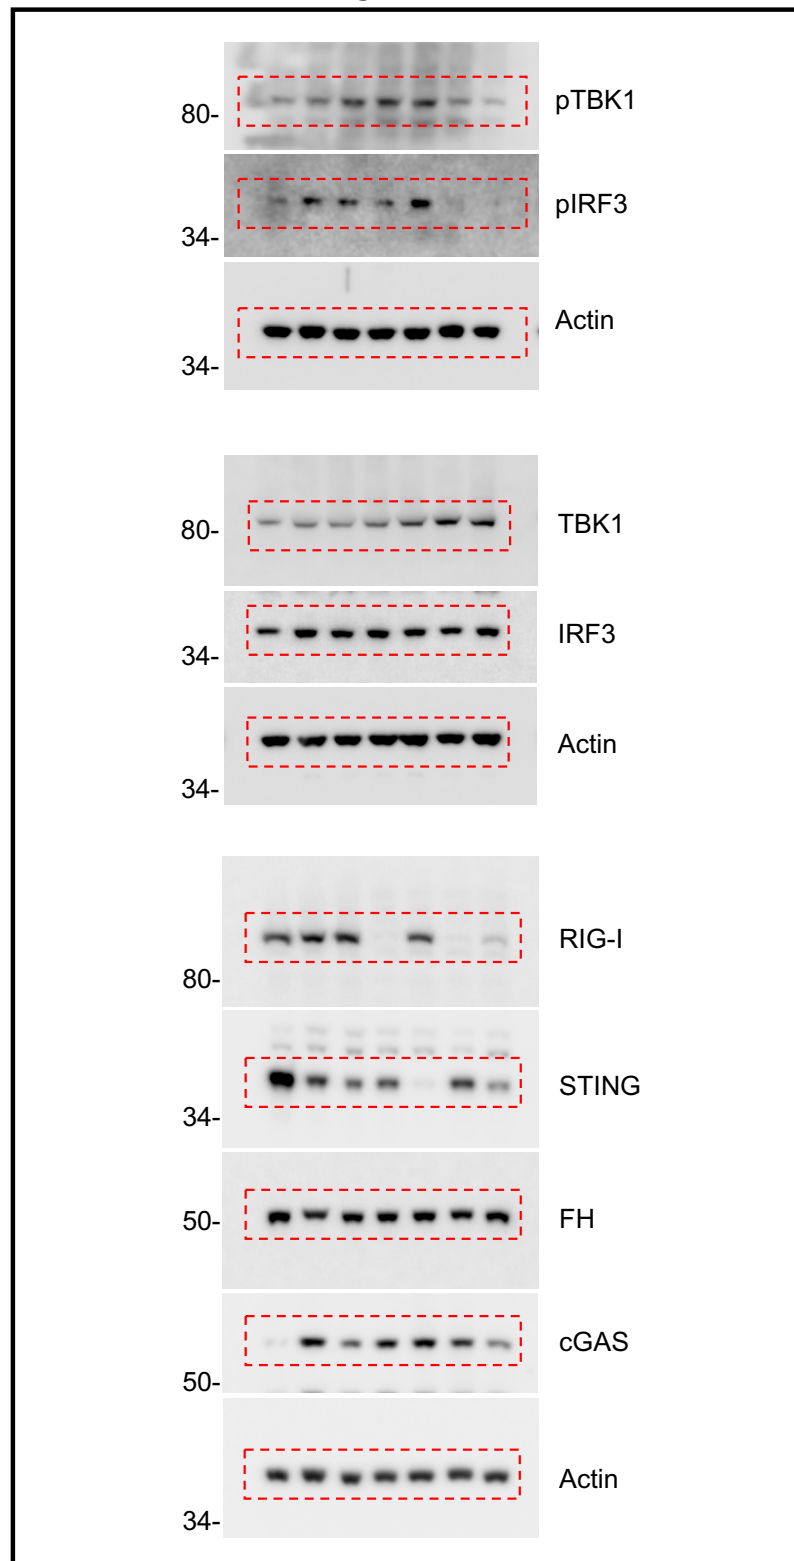



**Figure 4J**

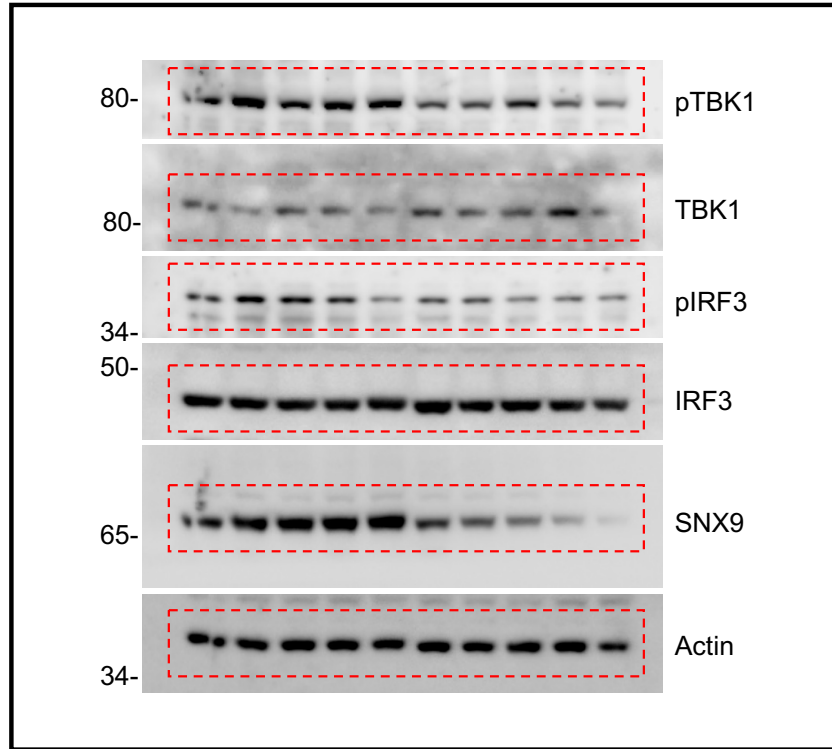

## Uncropped Immunoblots: Extended Data Figures

Figure ED1a

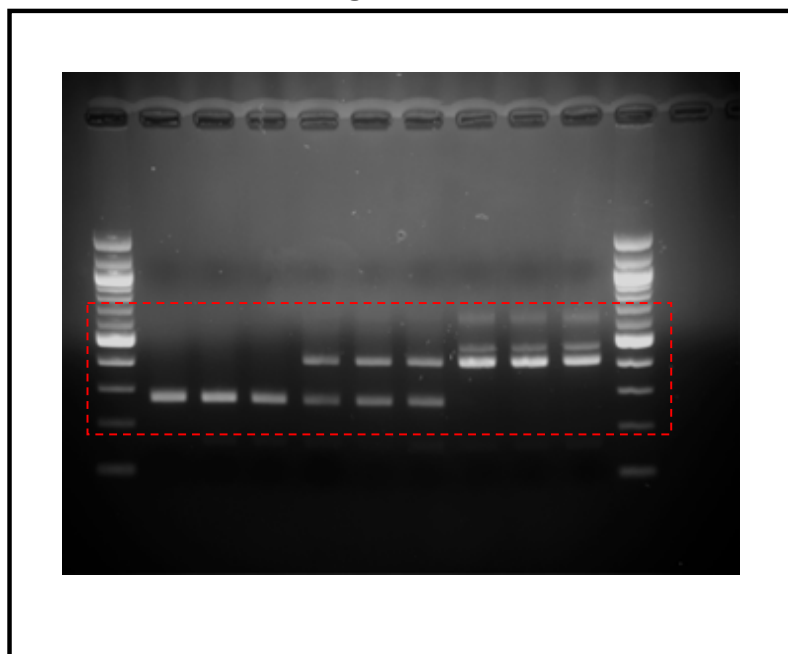

**Figure ED1b**

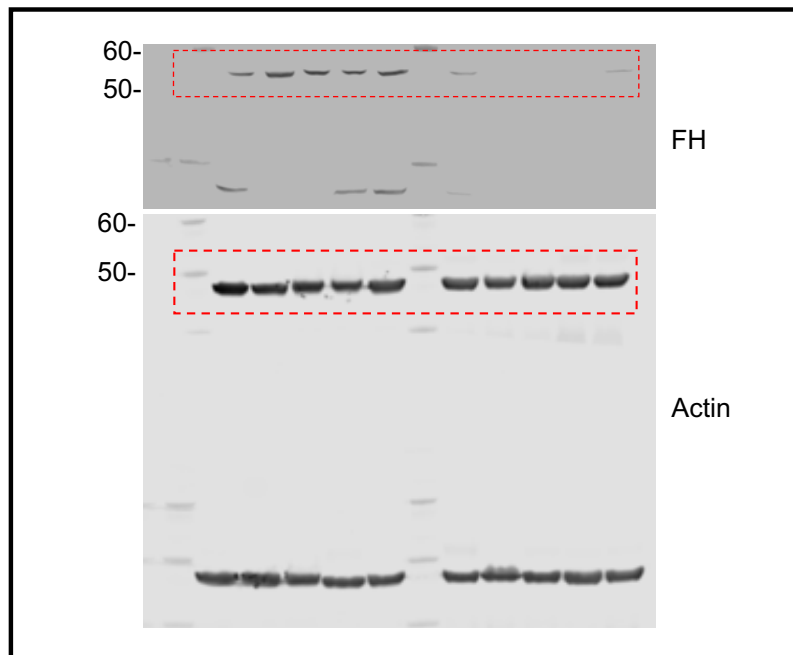

**Figure ED3k**

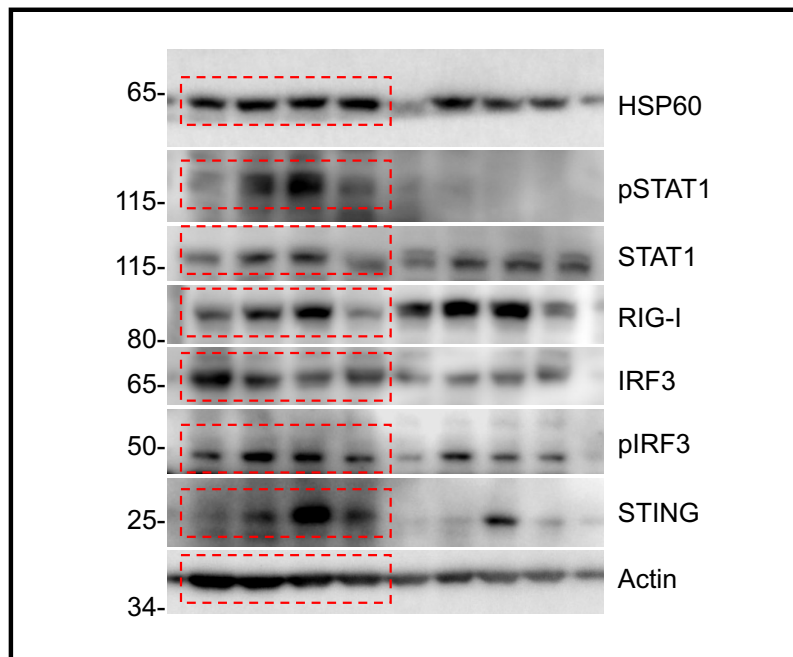

**Figure ED6h**

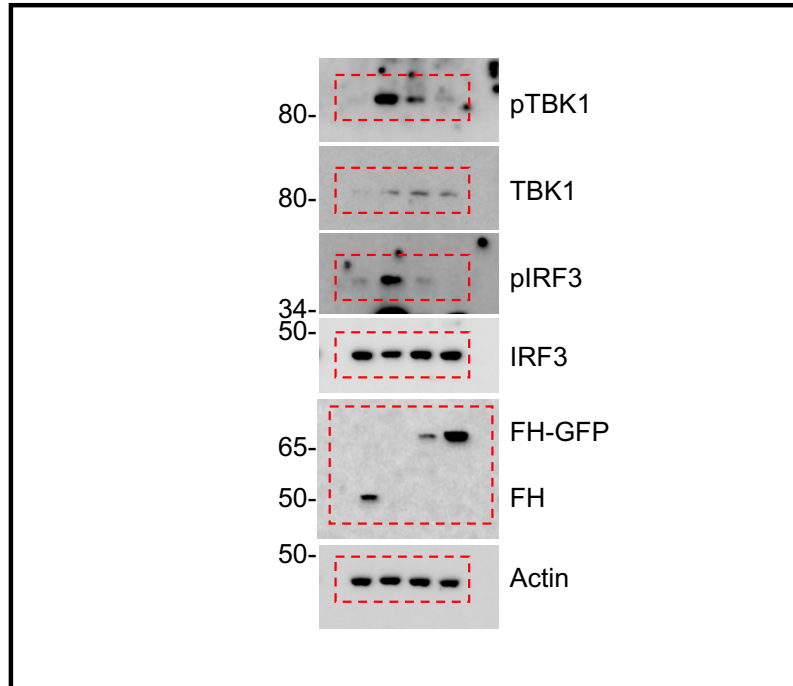

**Figure ED7e**

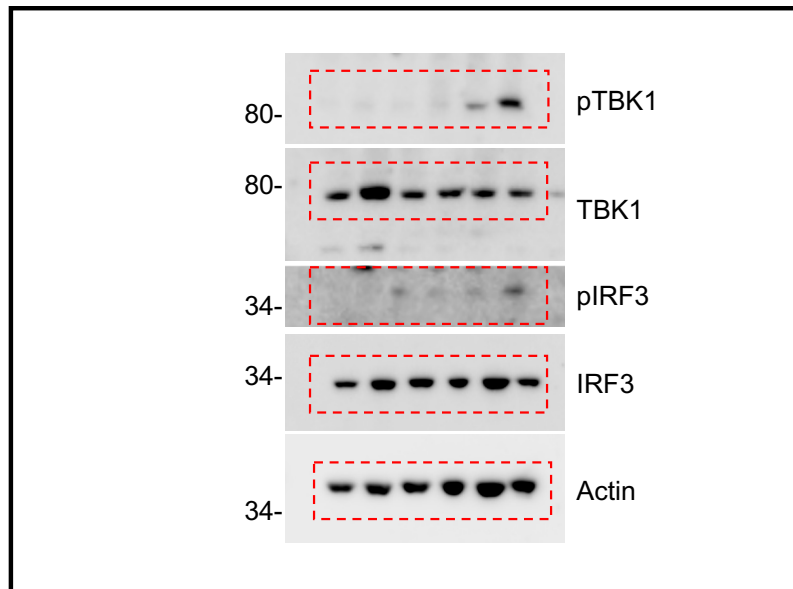

**Figure ED7f**

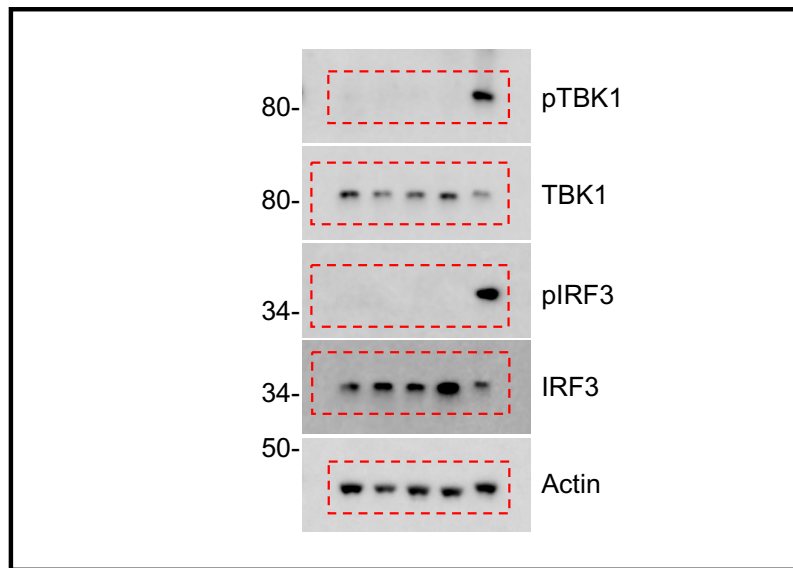

**Figure ED8i**

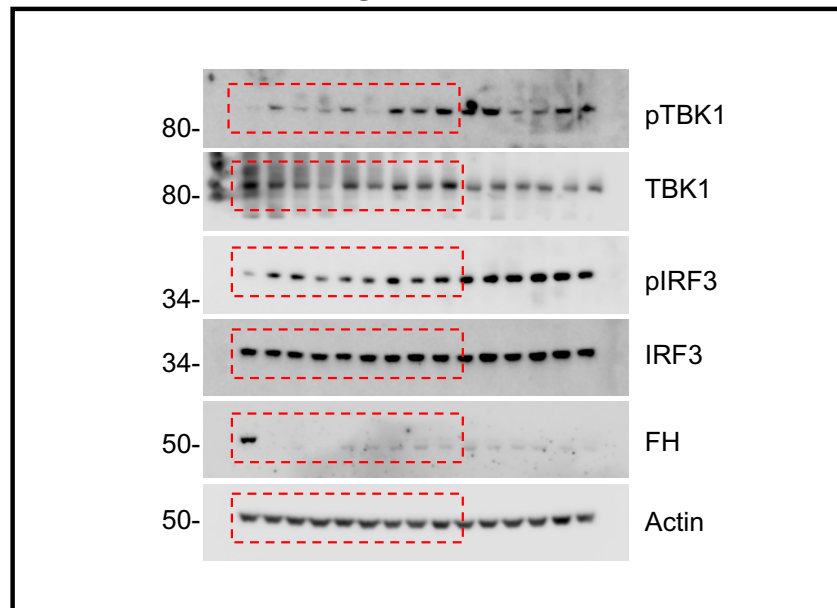

**Figure ED9f**

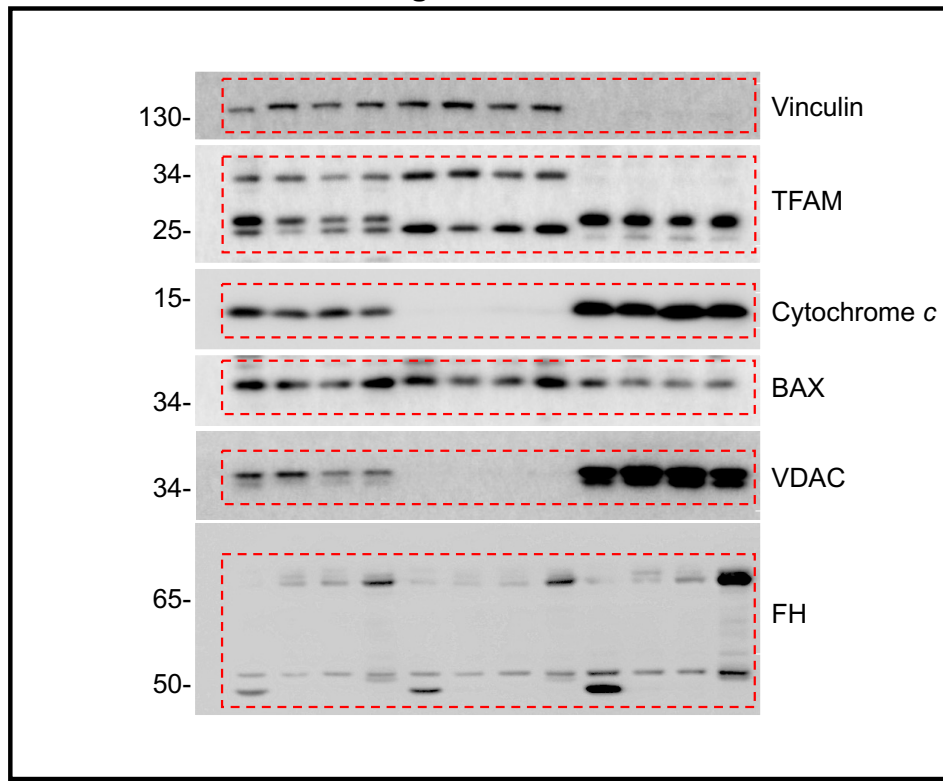

**Figure ED10d**

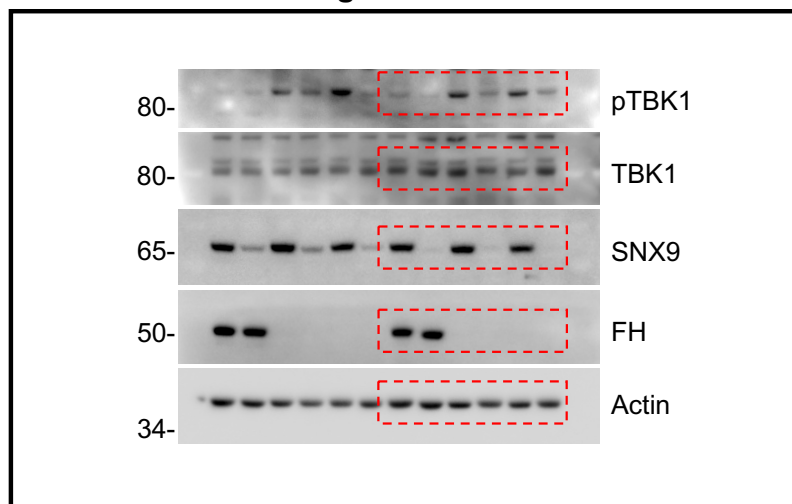

**Figure ED10i**

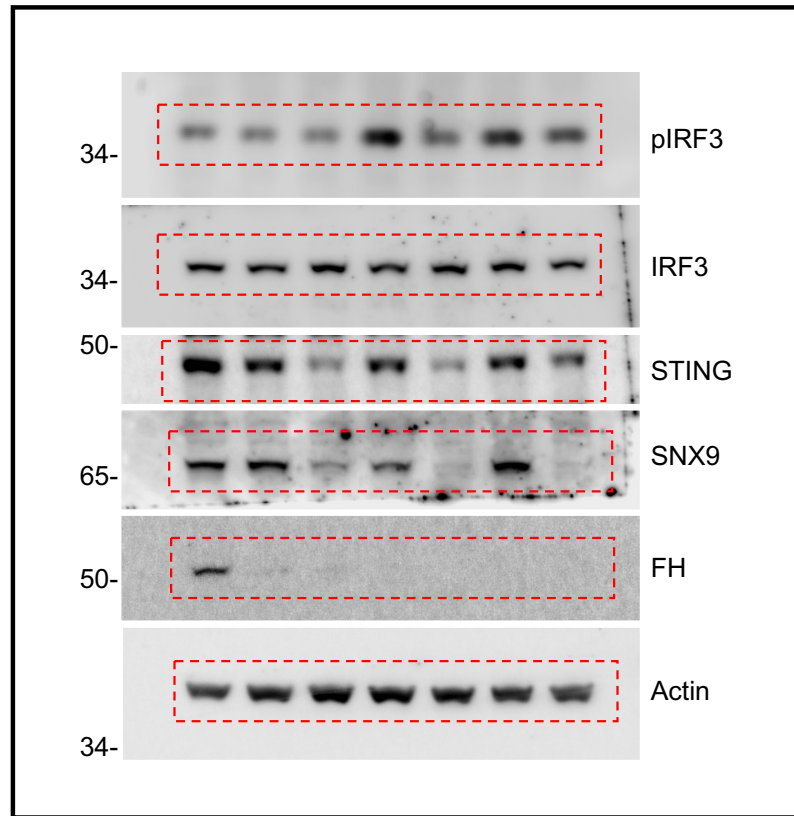

## Uncropped Immunoblots: Supplementary Figures

**Supplementary Figure 4e**

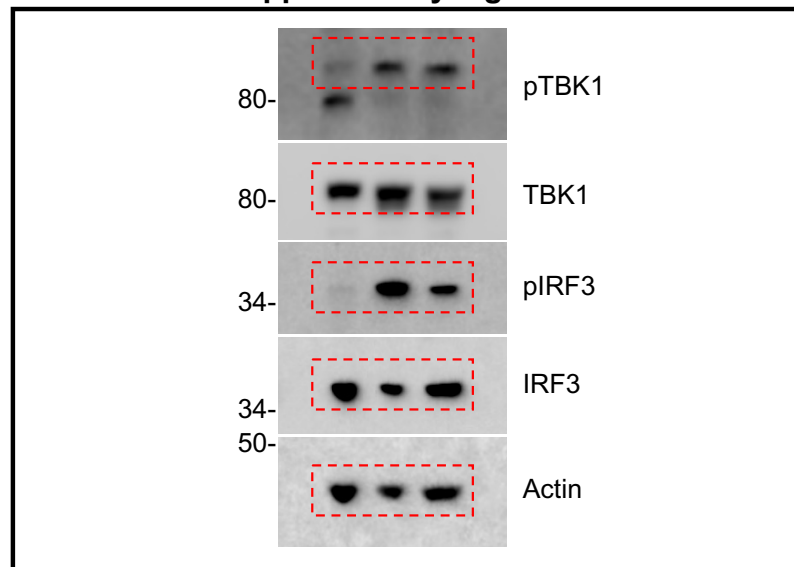

**Supplementary Figure 7b**

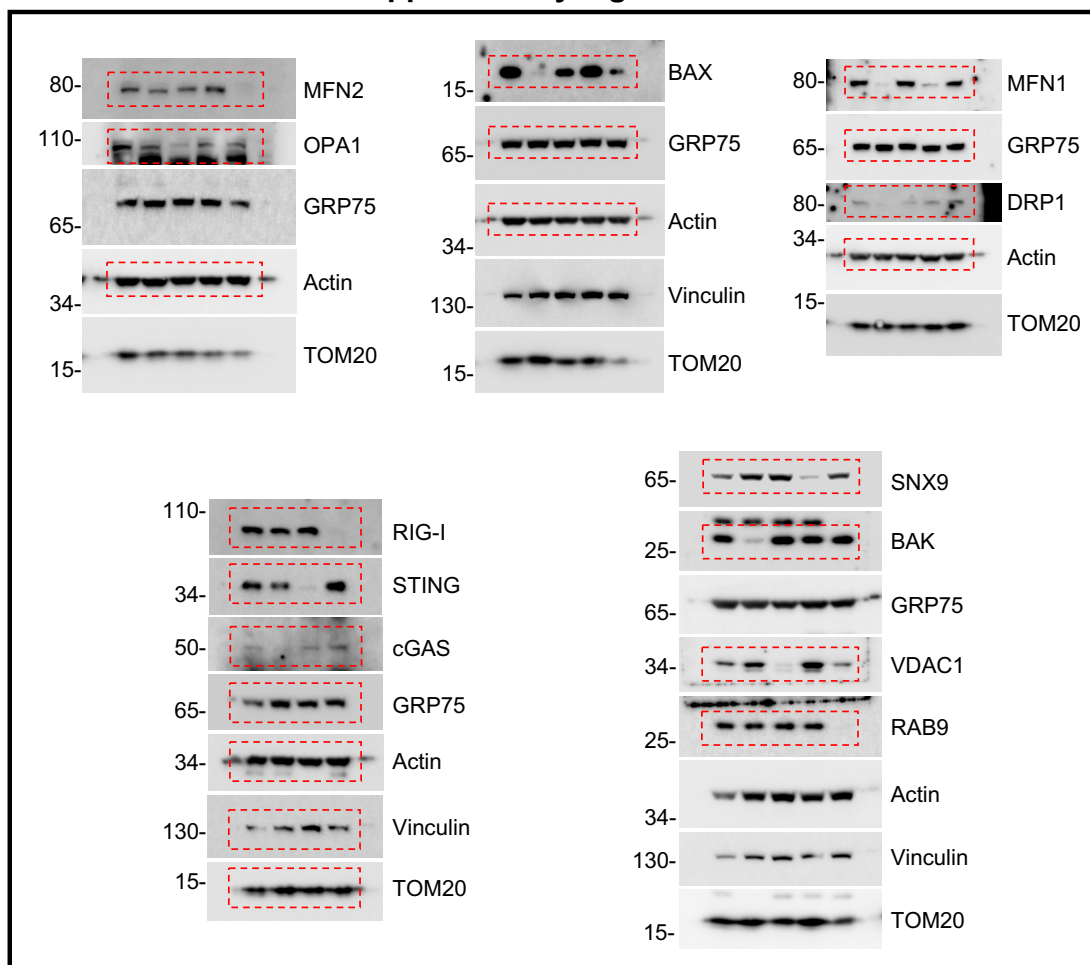



**Supplementary Figure 8a**

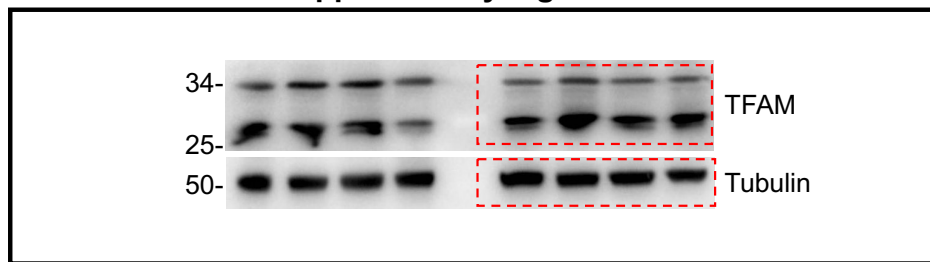

**Supplementary Figure 10**

Uncropped gels and immunoblots from figures.

**Supplementary Table 1: RNASeq analysis of the *Fhl1*<sup>-/-</sup> vs *Fhl1*<sup>+/+</sup> mouse kidney at Days 5 and 10 upon tamoxifen treatment. See Excel sheet 1.**

**Supplementary Table 2: Biological processes analysis of the *Fhl1*<sup>-/-</sup> vs *Fhl1*<sup>+/+</sup> mouse kidney at Day 5 upon tamoxifen treatment. See Excel sheet 2.**

**Supplementary Table 3: KEGG pathway analysis of the *Fhl1*<sup>-/-</sup> vs *Fhl1*<sup>+/+</sup> mouse kidney at Day 5 upon tamoxifen treatment. See Excel sheet 3.**

**Supplementary Table 4: Mouse primers list.**

| Target        | forward               | reverse                |
|---------------|-----------------------|------------------------|
| Mm Areg       | TGGCAGTGAACCTCTCCACAG | TTCTTGGGCTTAATCACCTGTT |
| Mm Ccl17      | AGTGGAGTGTTCCAGGGATG  | TGGCCTTCTTCACATGTTTG   |
| Mm Ccl2       | AAGAGGATCACCAGCAGCAG  | TCTGGACCCATTCTTCTTG    |
| Mm Ccl20      | TTTTTGGGATGGAATTGGAC  | AGGTCTGTGCAGTGATGTGC   |
| Mm cGas       | TCAGCTACCAAGATGCTGTCA | GGCTTCCTGGTTTTTCCTTC   |
| Mm Cxcl10     | CCAAGTGCTGCCGTCATTTTC | GGCTCGCAGGGATGATTTCAA  |
| Mm Fhl1 ex2-3 | AACGTATGCCAATCCCAGTC  | CATCTGCGGCCTTCATTATT   |
| Mm Hmgb1      | TGACAAGCAGCCCTATGAGA  | CTTTTTCGCTGCATCAGGTT   |
| Mm Hmox1      | GGTCAGGTGTCCAGAGAAGG  | GCTTGTTGCGCTCTATCTCC   |
| Mm Ifi202b    | GAAAGGCTGGTTGATGGAGA  | CCACCACTTTCATTGCTCCT   |
| Mm Ifitm10    | CGAGGTCTACCCGGACACTA  | GTAGGCCAGAGCAATGAAGC   |
| Mm Ifnb       | CCCTATGGAGATGACGGAGA  | CCCAGTGCTGGAGAAATTGT   |
| Mm Il6        | CCGGAGAGGAGACTTCACAG  | TCCACGATTTCCCAGAGAAC   |
| Mm Mx1        | GGTCCAAACTGCCTTCGTAA  | TTCAGCTTCCTTTTCTTGTTT  |
| Mm Mx1        | GGTCCAAACTGCCTTCGTAA  | TTCAGCTTCCTTTTCTTGTTT  |
| Mm Nqo1       | AGGCTGGTTTGAGAGAGTGC  | CCCCAGTGGTGATAGAAAGC   |
| Mm Rplp0      | GATTTCGGGATATGCTGTTGG | TCGGGTCCTAGACCAGTGTT   |
| Mm Snx9       | GCACAGCTCAAACCAACTCA  | AGGTTTGGGAGCATTCCAG    |
| Mm Snx9       | GCACAGCTCAAACCAACTCA  | AGGTTTGGGAGCATTCCAG    |
| Mm Tfam       | AAGGATGATTTCGGCTCAGG  | GGCTTTGAGCACTAACTGG    |

**Supplementary table 5: Human primers list.**

| target  | forward                | reverse                  |
|---------|------------------------|--------------------------|
| AREG    | CGGGAGCCGACTATGACTAC   | GGGGGCTTAACTACCTGTTCA    |
| CCL2    | GCCTCCAGCATGAAAGTCTC   | GTGACTGGGGCATTGATTG      |
| CCL20   | TTTATTGTGGGCTTCACACG   | GATTTGCGCACACAGACAAC     |
| CSF3    | GTGCTGCTCGGACACTCTCT   | TAGAGGAAAAGGCCGCTATG     |
| FH      | TGCAATAATGAAGGCAGCAG   | TGATCCAGTCTGCCATACCA     |
| IFI16   | TCTTCACAAACAAGCTTCAGGA | CCTGAATTTTCGTAGATTGTGGTC |
| IFITM10 | CTTCATCGCCTTGGCCTACT   | GGCAGAACTGGTGATGTTGA     |
